# Supplementary material for: The Na+/K+ pump dominates control of glycolysis in hippocampal dentate granule cells
Source: eLife journal article supplement (doi:10.7554/elife.81645), 2022-10-12
Supplement: supp [file elife-81645-supp-v1.zip]

**Figure 1 - Supplement 1 – Source Data 1**

| **Mean Peredox and RCaMP Lifetimes (ns)** | | | | | |
| --- | --- | --- | --- | --- | --- |
|  |  | External Condition | | | |
|  |  | ACSF | 0 Na+ and 0 Ca2+ | 0 Na+ and 0.5 mM Ca2+ | 0 Na+ and 0 Ca2+ (after the Ca2+CYT increase) |
| **No Thapsigargin** | Peredox | 1.66 ± 0.06 | 1.56 ± 0.03 | 1.50 ± 0.04 | 1.52 ± 0.04 |
| RCaMP | 0.88 ± 0.05 | 0.87 ± 0.04 | 1.53 ± 0.16 | 0.90 ± 0.05 |
| **Thapsigargin (1 μM)** | Peredox | 1.62 ± 0.04 | 1.55 ± 0.03 | 1.50 ± 0.05 | 1.52 ± 0.03 |
| RCaMP | 0.87 ± 0.05 | 0.88 ± 0.07 | 1.51 ± 0.16 | - 1. 0.05 |
