# Supplementary material for: The Na+/K+ pump dominates control of glycolysis in hippocampal dentate granule cells
Source: eLife journal article supplement (doi:10.7554/elife.81645), 2022-10-12
Supplement: supp [file elife_poa_e81645_Figure_1_figure_supplement_3_source_data_1.docx]

**Figure 1 - Supplement 3 – Source Data 1**

| **Mean mito-RCaMP Lifetimes (ns)** | | | | | |
| --- | --- | --- | --- | --- | --- |
|  | External Condition | | | | |
|  | ACSF | 0 Na+ and 0 Ca2+ | 0 Na+ and 0.5 mM Ca2+ | 0 Na+ and 0 Ca2+ (after 20 min in 0 Na+ and 0 Ca2+) | 147 Na+ and 0 Ca2+ |
| mito-RCaMP | 0.92 ± 0.05 | 0.91 ± 0.05 | 1.75 ± 0.23 | 1.40 ± 0.24 | 0.89 ± 0.08 |
